# Supplementary material for: A nivalenol imprinted quartz crystal microbalance sensor based on sulphur-incorporating cobalt ferrite and its application to rice samples
Source: Royal Society of Chemistry journal article supplement (doi:10.1039/d4ay00008k), 2024-01-01
Supplement: d4ay00008k1.pdf [file d4ay00008k1.pdf]

## Supplementary Data

For

### **Nivalenol imprinted quartz crystal microbalance sensor based on sulphur incorporated cobalt ferrite and its application to rice samples**

Betül Demir<sup>a</sup>, Bahar Bankoğlu Yola<sup>b</sup>, Sena Bekerecioğlu<sup>a</sup>, İlknur Polat<sup>a</sup>, Mehmet Lütfi Yola<sup>a\*</sup>

<sup>a</sup>*Department of Nutrition and Dietetics, Faculty of Health Sciences, Hasan Kalyoncu University, Gaziantep, 27000, Turkey*

<sup>b</sup>*Department of Engineering Basic Sciences, Faculty of Engineering and Natural Sciences, Gaziantep Islam Science and Technology University, Gaziantep, 27000, Turkey*

*\*Correspondence: [mlutfi.yola@hku.edu.tr](mailto:mlutfi.yola@hku.edu.tr); Tel.: +90-3422118080; Fax: +90-3422118081*

## Sensitivity

$$LOQ = 10.0 S / m$$

$$LOD = 3.3 S / m$$

S: Standard deviation of the intercept and m: Slope of the regression line

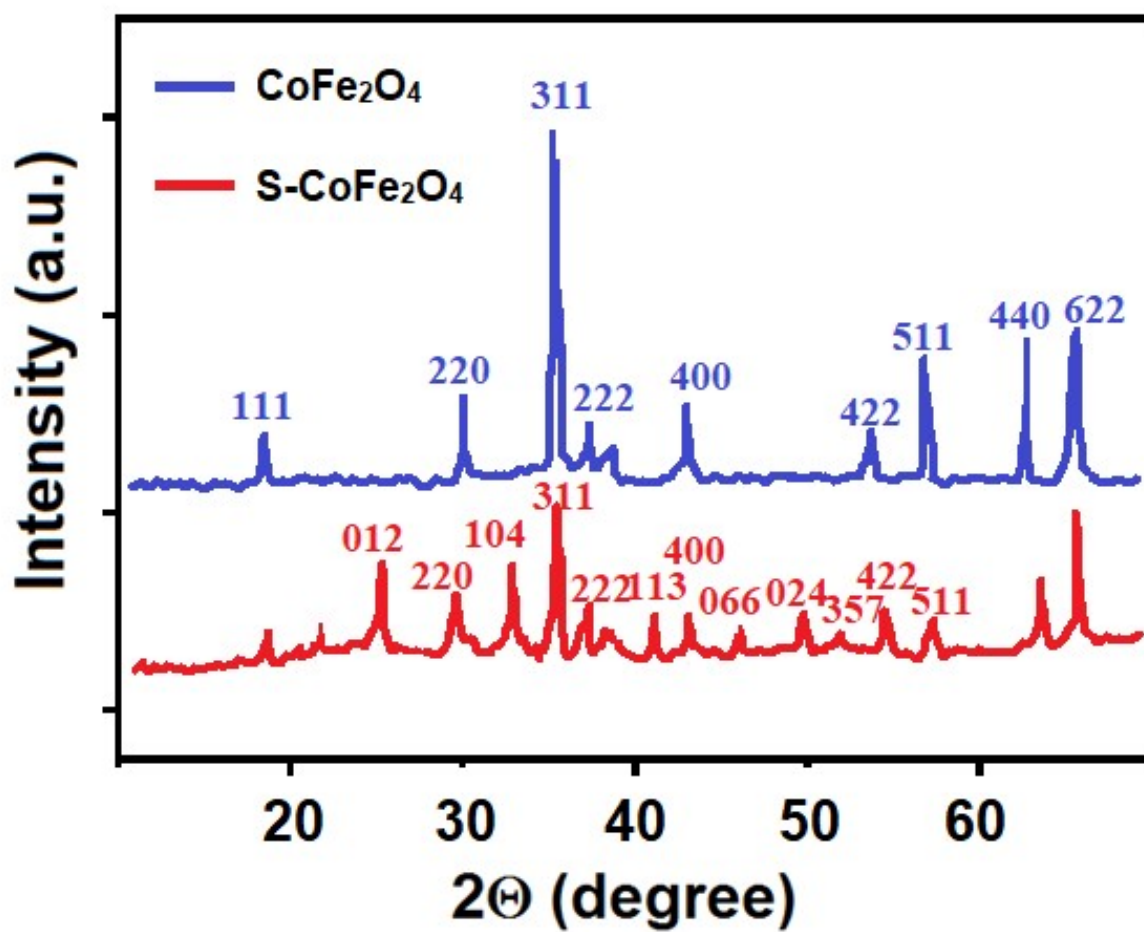

Fig. S1. XRD patterns of CoFe<sub>2</sub>O<sub>4</sub> and S-CoFe<sub>2</sub>O<sub>4</sub>

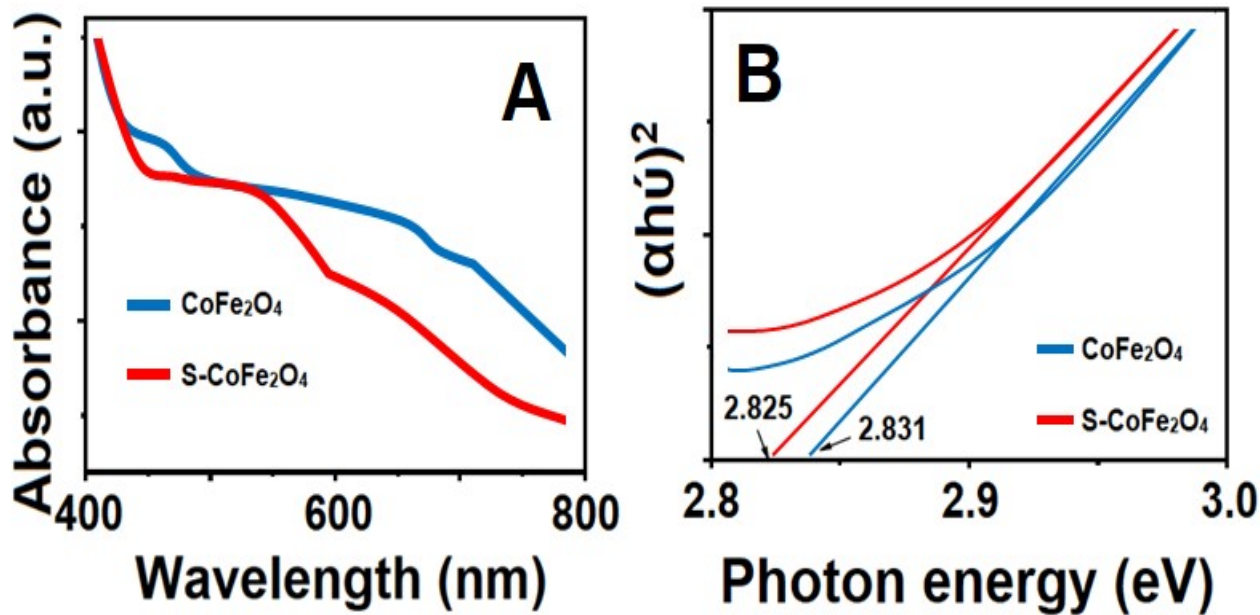

Fig. S2. (A) UV-Vis spectra and (B) the band gap of CoFe<sub>2</sub>O<sub>4</sub> and S-CoFe<sub>2</sub>O<sub>4</sub>

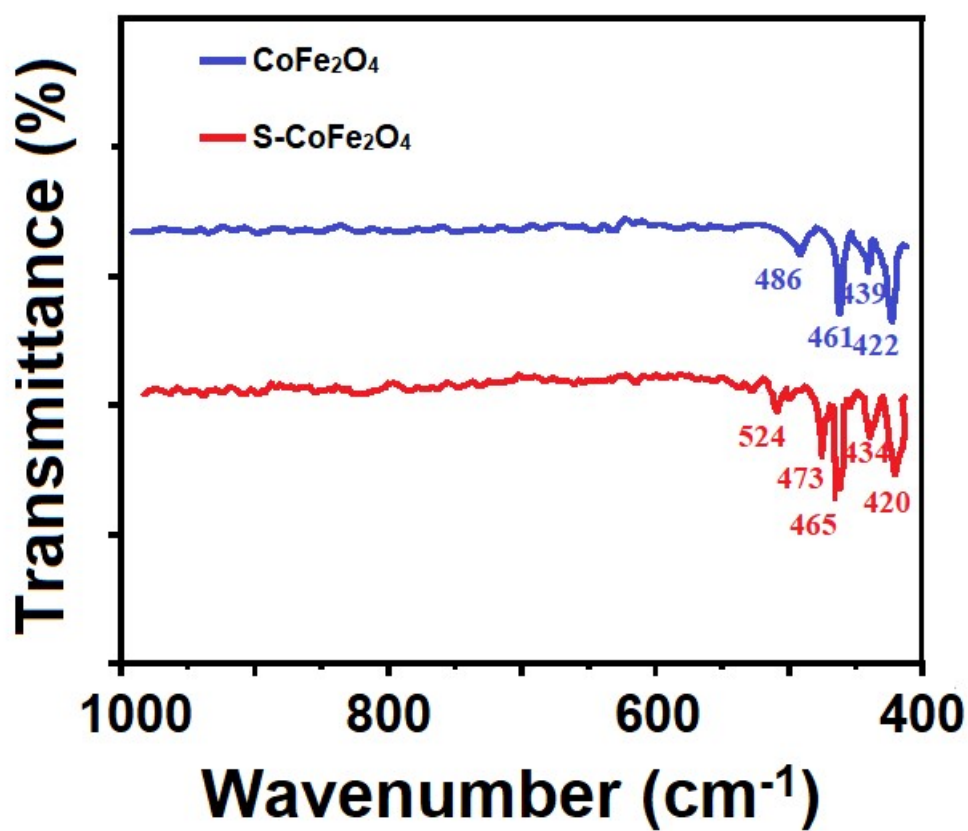

Fig. S3. FTIR spectra of CoFe<sub>2</sub>O<sub>4</sub> and S-CoFe<sub>2</sub>O<sub>4</sub>

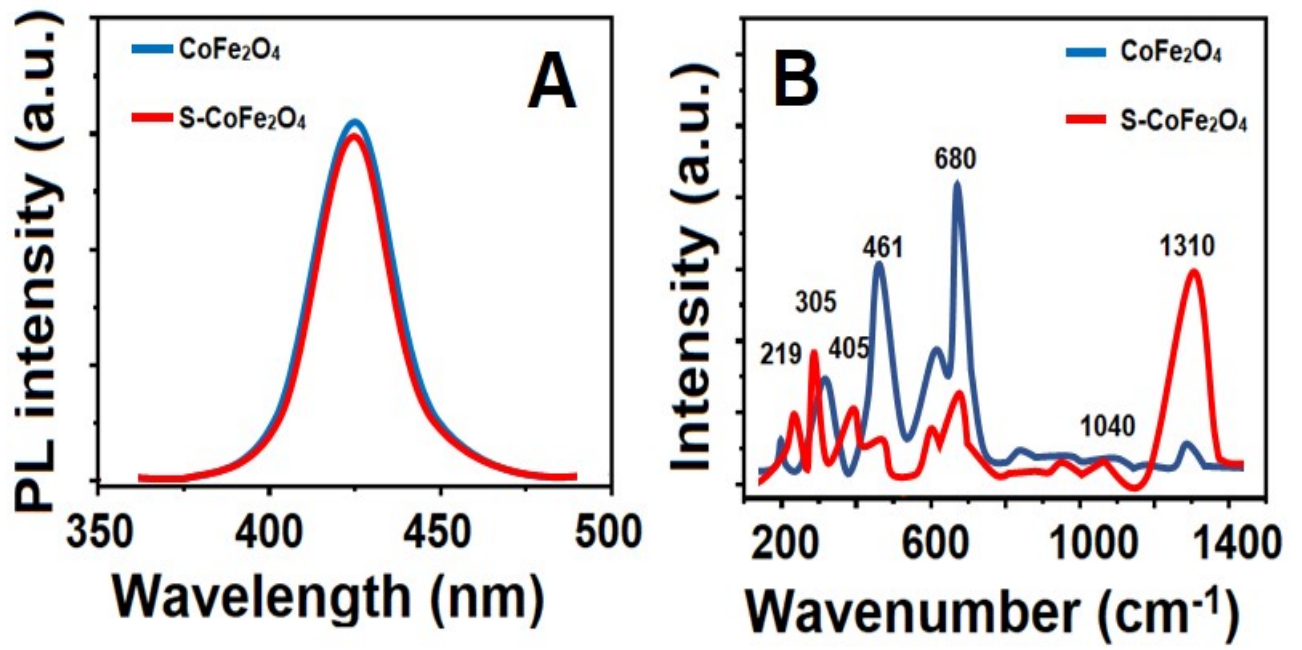

Fig. S4. (A) PL spectra and (B) Raman spectra of CoFe<sub>2</sub>O<sub>4</sub> and S-CoFe<sub>2</sub>O<sub>4</sub>

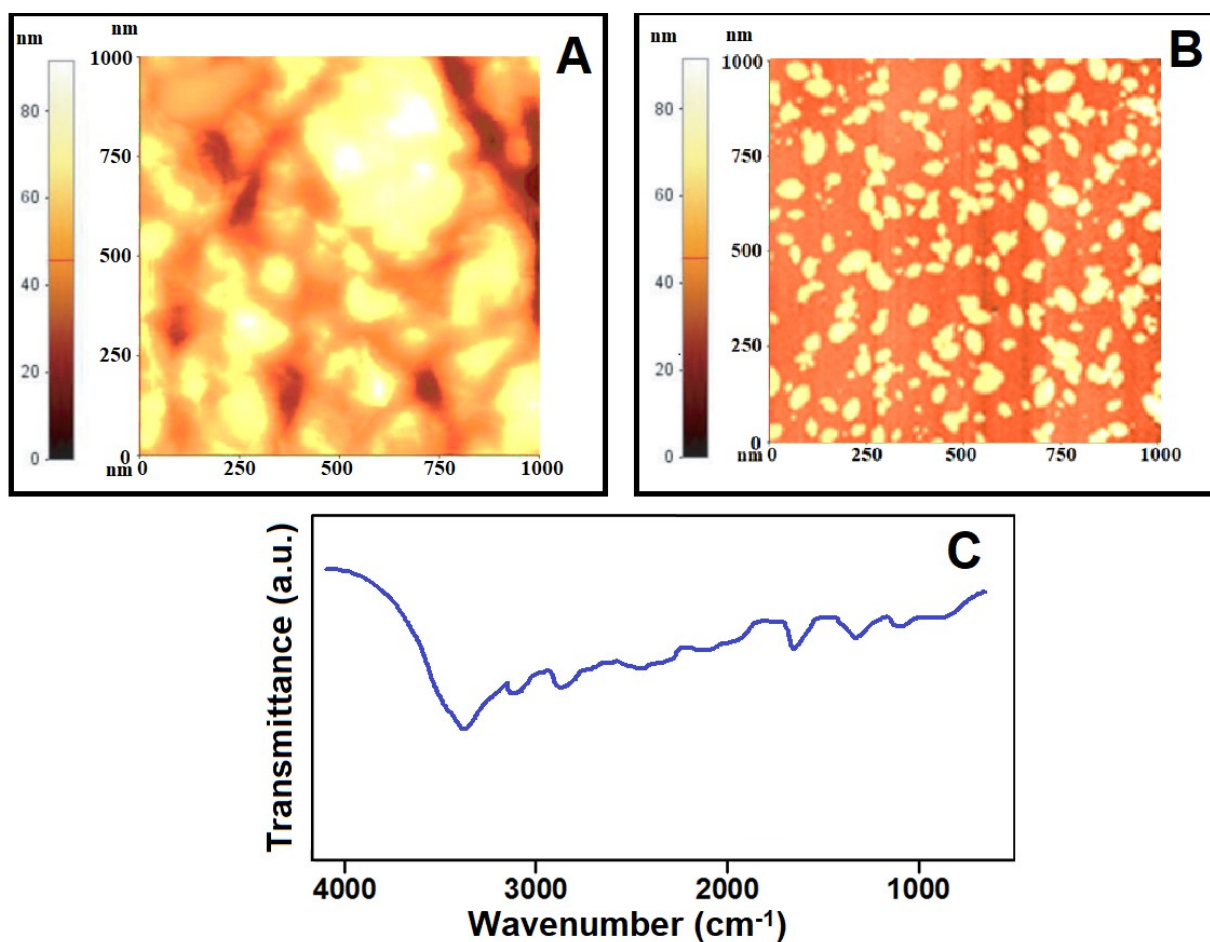

**Fig. S5.** AFM images of (A) bare QCM chip, (B) NIV imprinted film on S-CoFe<sub>2</sub>O<sub>4</sub>/QCM and (C) FTIR spectrum of NIV imprinted film on S-CoFe<sub>2</sub>O<sub>4</sub>/QCM

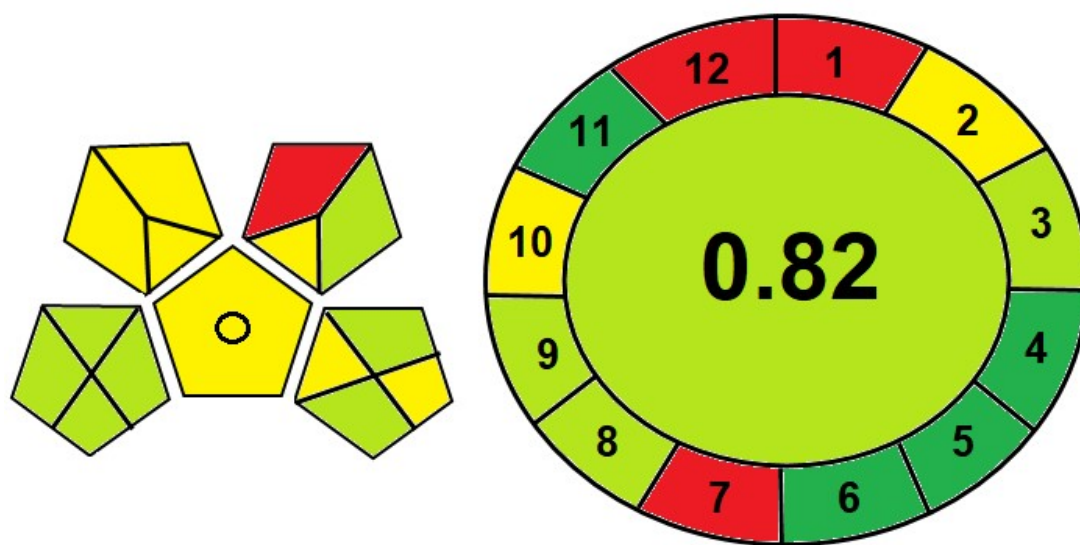

**Fig. S6.** Method greenness assessment tools pictograms

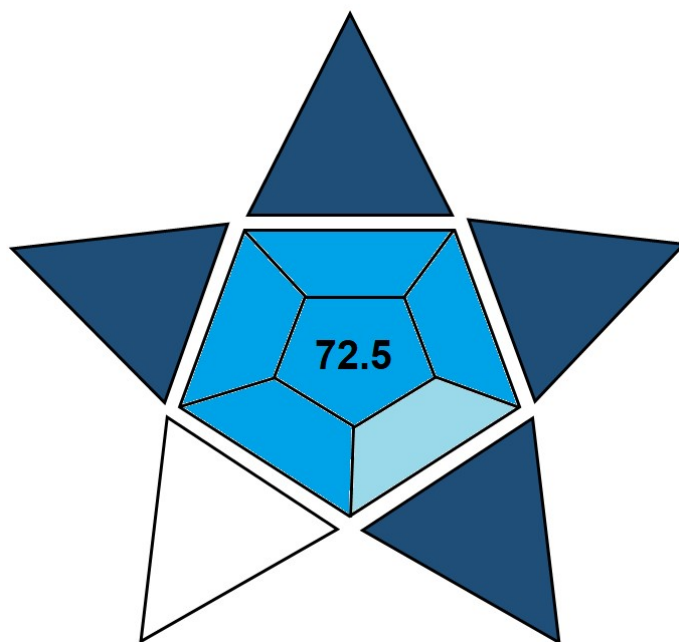

**Fig. S7.** Practicality assessment of NIV imprinted film on S-CoFe<sub>2</sub>O<sub>4</sub>/QCM using BAGI tools

**Table S1.** Comparison of the results obtained by MIP/S-CoFe<sub>2</sub>O<sub>4</sub>/QCM and LC-MS/MS methods for NIV detection (n = 6) (Added standard NIV = 4.000 ng L<sup>-1</sup>)

| Sample                           | Found NIV                                   |               |
|----------------------------------|---------------------------------------------|---------------|
|                                  | MIP/S-CoFe <sub>2</sub> O <sub>4</sub> /QCM | LC-MS/MS      |
| Rice grain (ng L <sup>-1</sup> ) | 4.861 ± 0.006                               | 4.860 ± 0.004 |
| SD                               | 0.015                                       | 0.010         |
| RSD                              | 0.30                                        | 0.20          |

$\bar{X}$  : Mean ± Standard Error, SD: Standard Deviation, RSD: % Relative Standard Deviation

**Table S2.** k and k' values of NIV imprinted QCM chips (MIP/S-CoFe<sub>2</sub>O<sub>4</sub>/QCM and NIP/S-CoFe<sub>2</sub>O<sub>4</sub>/QCM) (n=6)

|       | MIP                               |       | NIP                               |       | k'    |
|-------|-----------------------------------|-------|-----------------------------------|-------|-------|
|       | $\Delta m$ (nM cm <sup>2</sup> -) | k     | $\Delta m$ (nM cm <sup>2</sup> -) | k     |       |
| NIV   | 10.5 ± 0.01                       | -     | 0.20 ± 0.01                       | -     | -     |
| BEA   | 1.00 ± 0.03                       | 10.50 | 0.15 ± 0.04                       | 1.33  | 7.89  |
| DON   | 0.50 ± 0.02                       | 21.00 | 0.10 ± 0.07                       | 2.00  | 10.50 |
| ZEN   | 0.40 ± 0.05                       | 26.25 | 0.05 ± 0.02                       | 4.00  | 6.56  |
| 3ADON | 0.30 ± 0.06                       | 35.00 | 0.01 ± 0.03                       | 20.00 | 1.75  |

Analyte concentrations: 5.0 ng L<sup>-1</sup> NIV, 1000.0 ng L<sup>-1</sup> BEA, 1000.0 ng L<sup>-1</sup> DON, 1000.0 ng L<sup>-1</sup> ZEN and 1000.0 ng L<sup>-1</sup> 3ADON

k =  $\Delta m_{\text{NIV}}/\Delta m_{\text{interfering chemical}}$  and k' = k<sub>MIP</sub>/k<sub>NIP</sub>

**Table S3.** Intra-day and inter-day precision and accuracy results of NIV (n=6)

| Added standard NIV (ng L <sup>-1</sup> ) | Intra-day                                |                            |                           | Inter-day                                |                            |                           |
|------------------------------------------|------------------------------------------|----------------------------|---------------------------|------------------------------------------|----------------------------|---------------------------|
|                                          | Found <sup>a</sup> (ng L <sup>-1</sup> ) | Precision <sup>b</sup> (%) | Accuracy <sup>c</sup> (%) | Found <sup>a</sup> (ng L <sup>-1</sup> ) | Precision <sup>b</sup> (%) | Accuracy <sup>c</sup> (%) |
| 2.000                                    | 2.001 ± 0.001                            | 0.12                       | 0.05                      | 2.002 ± 0.002                            | 0.25                       | 0.10                      |
| 4.000                                    | 4.001 ± 0.002                            | 0.12                       | 0.03                      | 4.002 ± 0.002                            | 0.12                       | 0.05                      |
| 6.000                                    | 5.999 ± 0.003                            | 0.12                       | 0.02                      | 6.001 ± 0.004                            | 0.16                       | 0.02                      |

<sup>a</sup>Mean ± Standart Error, <sup>b</sup>Precision %: Relative Standart Deviation (RSD), <sup>c</sup>Bias %: [(found – added)/added]×100%
